# Supplementary material
Source: Springer Nature journal article supplement (https://www.springerprofessional.de/resource/supplementary/13638_2012_640_MOESM4_ESM.pdf/11898380)

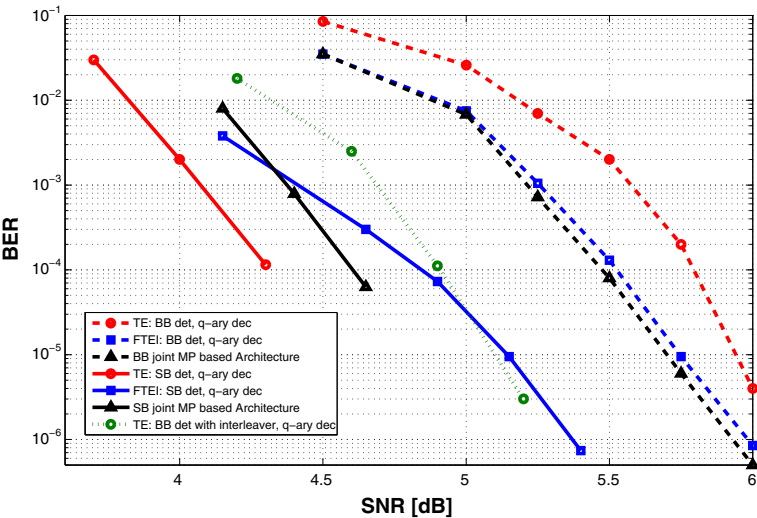

Supplement: MOESM4 [file 11898380]
